# Supplementary material
Source: PubMed Central journal article supplement (PMC3062355)
Supplement: blood-2010-10-312462_1.pdf [file blood-2010-10-312462_1.pdf]

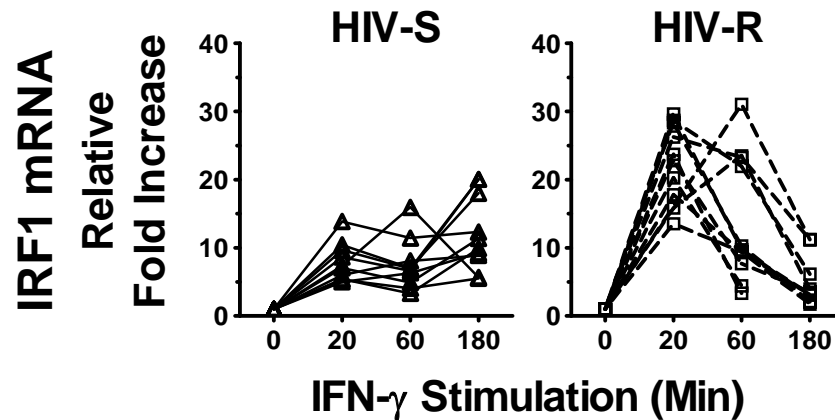

**Figure S1. IRF1 mRNA response to exogenous IFN- $\gamma$  stimulation.** *Ex vivo* PBMC from HIV-S ( $\Delta$ , n=10) and HIV-R ( $\square$ , n=12) individuals were stimulated with exogenous IFN- $\gamma$  (10ng/ml). At the indicated time points, RNA were isolated and IRF1 mRNA level was examined using RT-qPCR. There was no significant difference in mRNA level between the unstimulated samples (t=0, 20, 60 or 180 min). Unstimulated sample from t=0 is used as reference for calculating relative fold increases. mRNA levels were normalized to endogenous 18S RNA.

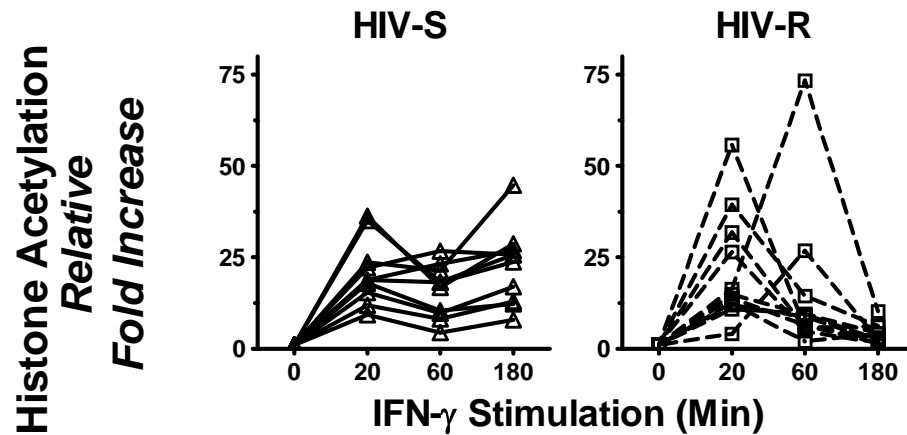

**Figure S2. Changes in histone H4 acetylation level at IRF1 intron7, in response to exogenous IFN- $\gamma$  stimulation.** *Ex vivo* PBMC from HIV-S (n=10,  $\Delta$ ) and HIV-R (n=11,  $\square$ ) individuals were stimulated with exogenous IFN- $\gamma$  (10ng/ml). At the indicated time points, chromatin were isolated and analyzed for histone H4 acetylation at IRF1 intron7, using ChIP and qPCR. ChIP'ed DNA were normalized to input-DNA. There was no difference in histone H4 acetylation level between the unstimulated samples, cultured in media alone for 0, 60 or 180min. Unstimulated sample from t=0 is used as reference for calculating relative fold increases.
